# Supplementary material for: Cisplatin and Fluorouracil Alone or with Docetaxel in Head and Neck Cancer
Source: Atypon-hosted journal article supplement (doi:10.1056/nejmoa070956), 2007-10-24

## Supplementary Appendix

This appendix has been provided by the authors to give readers additional information about their work.

Supplement to: Posner MR, Hershock DM, Blajman CR, et al. Cisplatin and fluorouracil alone or with docetaxel in head and neck cancer. *N Engl J Med* 2007;357:1705-15.

**Supplementary Table 1. Best Overall Response to Induction Chemotherapy.\***

|                                                         | <b>TPF<br/>(N=255)</b> | <b>PF<br/>(N=246)</b> |
|---------------------------------------------------------|------------------------|-----------------------|
| Best overall response — no. (%)                         |                        |                       |
| Complete response                                       | 42 (17)                | 37 (15)               |
| Partial response                                        | 141 (55)               | 121 (49)              |
| No change                                               | 30 (12)                | 41 (17)               |
| Progressive disease                                     | 17 (7)                 | 24 (10)               |
| Not evaluable                                           | 24 (9)                 | 23 (9)                |
| Missing                                                 | 1 (0.4)                | 0                     |
| Overall response rate — %<br>(95% confidence interval)  | 72<br>(66 to 77)       | 64<br>(58 to 70)      |
| P value                                                 |                        | 0.07                  |
| Complete response rate — %<br>(95% confidence interval) | 17<br>(12 to 22)       | 15<br>(11 to 20)      |
| P value                                                 |                        | 0.66                  |

\*Defined as the best response recorded from the date of randomization until disease progression or the end of chemotherapy cycles.

**Supplementary Table 2. Exposure to Study Drug during Induction Chemotherapy.\***

|                                | <b>TPF</b><br><b>(N=251)</b> | <b>PF</b><br><b>(N=243)</b> |
|--------------------------------|------------------------------|-----------------------------|
| Median no. of cycles           | 3                            | 3                           |
| Median relative dose intensity |                              |                             |
| Docetaxel                      | 0.98                         | —                           |
| Cisplatin*                     | 0.99                         | 0.90                        |
| 5-fluorouracil                 | 0.98                         | 0.88                        |

\*Six patients in each group received carboplatin instead of cisplatin.

Abbreviations: PF, cisplatin plus 5-fluorouracil; TPF, docetaxel and cisplatin plus 5-fluorouracil.

**Supplementary Table 3. Nonhematologic Adverse Events Regardless of Relationship to Induction Chemotherapy.\***

| Adverse event | TPF<br>(N=251)                |            | PF<br>(N=243) |            | P value <sup>†</sup> |            |
|---------------|-------------------------------|------------|---------------|------------|----------------------|------------|
|               | <i>Percentage of patients</i> |            |               |            |                      |            |
|               | All Grades                    | Grades 3/4 | All Grades    | Grades 3/4 | All Grades           | Grades 3/4 |
| Nausea        | 76                            | 14         | 80            | 14         | 0.39                 | 1.00       |
| Alopecia      | 68                            | 4          | 44            | 1          | <0.001               | 0.09       |
| Stomatitis    | 66                            | 21         | 67            | 27         | 0.70                 | 0.14       |
| Lethargy      | 61                            | 5          | 56            | 10         | 0.20                 | 0.03       |
| Vomiting      | 56                            | 8          | 63            | 10         | 0.17                 | 0.54       |
| Diarrhea      | 48                            | 7          | 40            | 3          | 0.10                 | 0.07       |
| Anorexia      | 40                            | 12         | 34            | 12         | 0.16                 | 0.78       |

|                                   |    |    |    |    |      |      |
|-----------------------------------|----|----|----|----|------|------|
| Fever in absence of infection     | 29 | 4  | 28 | 3  | 0.69 | 1.00 |
| Constipation                      | 27 | 1  | 38 | <1 | 0.01 | 1.00 |
| Esophagitis/dysphagia/odynophagia | 25 | 13 | 26 | 9  | 0.76 | 0.26 |
| Infection                         | 23 | 6  | 28 | 5  | 0.26 | 0.70 |
| Rash/itch                         | 20 | 0  | 16 | <1 | 0.29 | 0.24 |
| Taste, sense of smell altered     | 20 | <1 | 17 | <1 | 0.36 | 0.62 |
| Headache                          | 18 | 2  | 15 | <1 | 0.54 | 0.29 |
| Insomnia                          | 18 | <1 | 17 | <1 | 0.91 | 1.00 |
| Mood                              | 18 | 1  | 18 | 1  | 1.00 | 1.00 |
| Cancer pain                       | 17 | 9  | 20 | 11 | 0.42 | 0.45 |
| Edema                             | 17 | 2  | 13 | 1  | 0.25 | 1.00 |
| Dizziness                         | 16 | 4  | 15 | 2  | 0.90 | 0.17 |

|                                |    |    |    |    |      |      |
|--------------------------------|----|----|----|----|------|------|
| Gastrointestinal pain/cramping | 15 | 5  | 10 | 2  | 0.17 | 0.07 |
| Local toxicity                 | 15 | <1 | 15 | 2  | 1.00 | 0.21 |
| Cough                          | 14 | <1 | 15 | <1 | 0.90 | 1.00 |
| Sensory                        | 14 | 1  | 14 | <1 | 0.90 | 0.62 |
| Weight loss                    | 14 | 2  | 14 | 2  | 1.00 | 0.75 |
| Altered hearing                | 13 | 1  | 19 | 2  | 0.08 | 0.33 |
| Heartburn                      | 13 | 2  | 13 | <1 | 1.00 | 0.69 |
| Shortness of breath            | 12 | 2  | 10 | 2  | 0.47 | 1.00 |
| Motor                          | 9  | <1 | 10 | 2  | 0.65 | 0.21 |

\*Adverse events occurring in at least 10% of patients regardless of relationship.

†P values were determined by Fisher's exact test.

Abbreviations: PF, cisplatin plus 5-fluorouracil; TPF, docetaxel and cisplatin plus 5-fluorouracil.

**Supplementary Table 4. Adverse Events Regardless of Relationship to Chemoradiotherapy.\***

| Adverse event                     | TPF<br>(N=202)                |            | PF<br>(N=184) |            | P value <sup>†</sup> |            |
|-----------------------------------|-------------------------------|------------|---------------|------------|----------------------|------------|
|                                   | <i>Percentage of patients</i> |            |               |            |                      |            |
|                                   | All Grades                    | Grades 3/4 | All Grades    | Grades 3/4 | All Grades           | Grades 3/4 |
| Stomatitis                        | 85                            | 37         | 88            | 38         | 0.56                 | 1.00       |
| Esophagitis/dysphagia/odynophagia | 68                            | 23         | 69            | 24         | 0.91                 | 0.81       |
| Mouth, nose dryness               | 57                            | 4          | 55            | 4          | 0.84                 | 1.00       |
| Nausea                            | 43                            | 6          | 44            | 6          | 0.84                 | 1.00       |
| Desquamation                      | 36                            | 4          | 34            | 5          | 0.67                 | 0.63       |
| Rash/itch                         | 34                            | 5          | 28            | 2          | 0.23                 | 0.09       |
| Vomiting                          | 34                            | 3          | 32            | 5          | 0.67                 | 0.46       |

|                               |    |    |    |    |      |      |
|-------------------------------|----|----|----|----|------|------|
| Weight loss                   | 33 | 5  | 38 | 8  | 0.34 | 0.32 |
| Anorexia                      | 32 | 11 | 33 | 15 | 0.91 | 0.29 |
| Infection                     | 32 | 9  | 33 | 7  | 0.83 | 0.45 |
| Taste, sense of smell altered | 32 | 3  | 30 | 4  | 0.74 | 0.79 |
| Lethargy                      | 29 | 6  | 33 | 6  | 0.44 | 1.00 |
| Constipation                  | 24 | <1 | 30 | 2  | 0.21 | 0.43 |
| Voice changes                 | 21 | 2  | 26 | 2  | 0.34 | 1.00 |
| Skin changes                  | 20 | 3  | 24 | 2  | 0.46 | 0.75 |
| Sensory                       | 19 | <1 | 15 | <1 | 0.28 | 1.00 |
| Cough                         | 17 | 0  | 17 | 0  | 1.00 | —    |
| Diarrhea                      | 17 | 0  | 20 | 2  | 0.51 | 0.11 |
| Sputum increased              | 15 | 4  | 11 | 2  | 0.37 | 0.14 |

|                               |    |    |    |    |      |      |
|-------------------------------|----|----|----|----|------|------|
| Cancer pain                   | 14 | 7  | 14 | 9  | 1.00 | 0.57 |
| Mood                          | 14 | <1 | 14 | 2  | 1.00 | 0.67 |
| Fever in absence of infection | 13 | 1  | 19 | <1 | 0.16 | 0.62 |
| Dizziness                     | 11 | 2  | 6  | <1 | 0.10 | 0.37 |

---

\*Adverse events occurring in at least 10% of patients regardless of relationship.

†P values were determined by Fisher's exact test.

Abbreviations: PF, cisplatin plus 5-fluorouracil; TPF, docetaxel and cisplatin plus 5-fluorouracil.

**Supplementary Table 5. Exposure to Study Treatment During Chemoradiotherapy.**

|                                            | <b>TPF</b><br><b>(N=202)</b> | <b>PF</b><br><b>(N=184)</b> |
|--------------------------------------------|------------------------------|-----------------------------|
| Median dose of radiotherapy — Gy           | 70                           | 70                          |
| Median dose of carboplatin — AUC           | 9.9*                         | 9.9                         |
| Median duration of chemoradiotherapy — wk. | 7.1                          | 7.1                         |

\*Three patients did not receive carboplatin in the TPF group.

Abbreviations: AUC, area under the curve; PF, cisplatin plus 5-fluorouracil; TPF, docetaxel and cisplatin plus 5-fluorouracil.

## **Supplementary Figure 1. Study Schema.**

Each patient remained in the study and was followed until death or study completion (whichever occurred first), regardless of the number of cycles received.

Response was evaluated by WHO criteria modified by removal of the requirement for confirming a tumor response by a second observation at least 4 weeks after the initial assessment. Since chemoradiotherapy was started as soon as possible after the end of induction chemotherapy, this modification allowed for patients who responded only after the third cycle of induction chemotherapy to proceed to the next phase of treatment without delay.

\*Centralized radiation standardization procedures were recommended prior to CRT.

†For patients not evaluable by physical examination.

‡Best response as assessed by the same method used at baseline (CT, MRI).

§Defined as  $\geq 25\%$  and  $< 50\%$  reduction in tumor size.

¶Defined as  $< 25\%$  reduction in tumor size.

Abbreviations: CR, complete response; CRT, chemoradiotherapy; CT, chemotherapy;

CT/MRI, computed tomography/magnetic resonance imaging; NC, no change; PR, partial response.

Supplementary Figure 1.

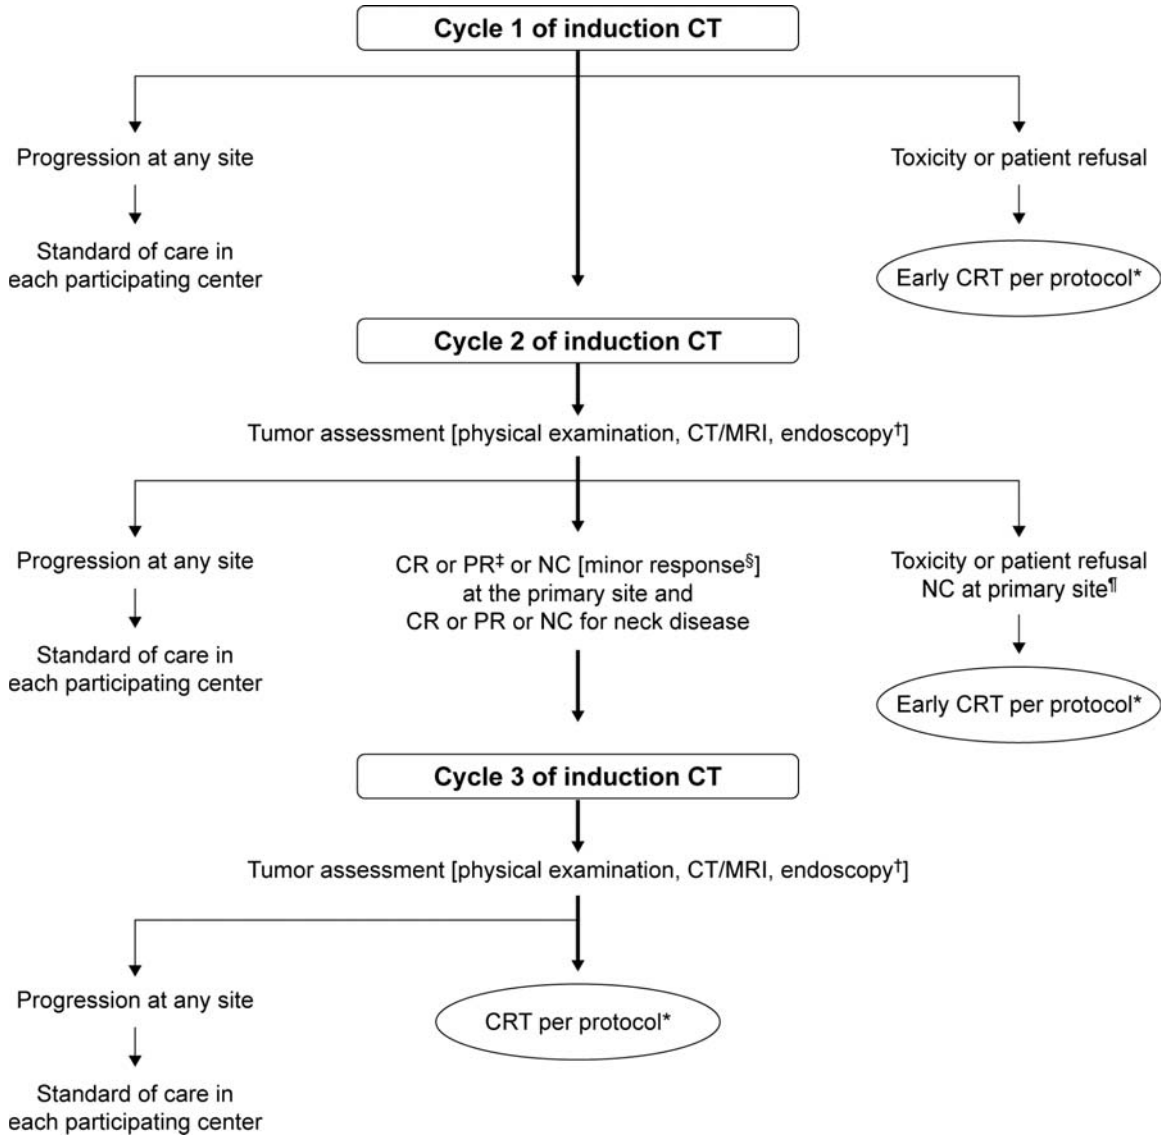

Supplement: nejm_posner_1705sa1.pdf [file nejm_posner_1705sa1.pdf]
